# Supplementary material for: Early retinal neurodegeneration and impaired Ran-mediated nuclear import of TDP-43 in progranulin-deficient FTLD
Source: PubMed Central journal article supplement — J Exp Med. 2014 Sep 22;211(10):1937–45. doi: 10.1084/jem.20140214 (PMC4172214; doi:10.1084/jem.20140214), 2014-09-22
Supplement: supp_jem.20140214_JEM_20140214_sm.pdf [file supp_jem.20140214_JEM_20140214_sm.pdf]

## SUPPLEMENTAL MATERIAL

Ward et al., <http://www.jem.org/cgi/content/full/jem.20140214/DC1>**Clinical characteristics of human subjects who underwent retinal imaging**

|                                          | Matched controls | All <i>GRN</i> mutation carriers | p value (ctrl vs <i>GRN</i> mt) |
|------------------------------------------|------------------|----------------------------------|---------------------------------|
| n (patients): RNFL                       | 24               | 12                               |                                 |
| n (patients): MacV                       | 24               | 11                               |                                 |
| n (eyes): RNFL                           | 48               | 24                               |                                 |
| n (eyes): MacV                           | 48               | 22                               |                                 |
| age yr (S.D.)                            | 57.3 (11.34)     | 55.5 (10.4)                      |                                 |
| male sex no. (%)                         | 6 (25)           | 4 (33)                           |                                 |
| CDR (S.D.)                               | 0 (0)            | 0.5 (0.8)                        |                                 |
| mean RNFL thickness $\mu\text{m}$ (S.D.) | 98.0 (7.6)       | 90.4 (7.7)                       | p = .001                        |
| mean MacV $\text{mm}^3$ (S.D.)           | 3.13 (0.14)      | 3.00 (0.13)                      | p = .004                        |
| mean GCC volume $\text{mm}^3$ (S.D.)     | 0.81 (0.07)      | 0.75 (0.07)                      | p = .002                        |
| mean INL volume $\text{mm}^3$ (S.D.)     | 0.33 (0.03)      | 0.31 (0.03)                      | p = .011                        |
| mean ONL volume $\text{mm}^3$ (S.D.)     | 0.69 (0.07)      | 0.66 (0.06)                      | p = .077                        |

|                                          | Matched controls | Pre-symptomatic <i>GRN</i> mutation carriers (CDR = 0) | p value (ctrl vs <i>GRN</i> mt) |
|------------------------------------------|------------------|--------------------------------------------------------|---------------------------------|
| n (patients): RNFL                       | 14               | 7                                                      |                                 |
| n (patients): MacV                       | 14               | 7                                                      |                                 |
| n (eyes): RNFL                           | 28               | 14                                                     |                                 |
| n (eyes): MacV                           | 28               | 14                                                     |                                 |
| age yr (S.D.)                            | 50.6 (10.7)      | 49.9 (9.1)                                             |                                 |
| male sex no. (%)                         | 3 (22)           | 3 (43)                                                 |                                 |
| CDR (S.D.)                               | 0                | 0                                                      |                                 |
| mean RNFL thickness $\mu\text{m}$ (S.D.) | 100.1 (7.2)      | 90.6 (9.2)                                             | p = .003                        |
| mean MacV $\text{mm}^3$ (S.D.)           | 3.19 (.12)       | 3.05 (0.11)                                            | p = .016                        |
| mean GCC volume $\text{mm}^3$ (S.D.)     | 0.84 (.04)       | 0.76 (.06)                                             | p < .001                        |
| mean INL volume $\text{mm}^3$ (S.D.)     | 0.33 (.03)       | 0.32 (0.03)                                            | p = .163                        |
| mean ONL volume $\text{mm}^3$ (S.D.)     | 0.71 (0.06)      | 0.68 (0.04)                                            | p = .174                        |

|                                          | Matched controls | Symptomatic <i>GRN</i> mutation carriers (CDR > 0) | p value (ctrl vs <i>GRN</i> mt) |
|------------------------------------------|------------------|----------------------------------------------------|---------------------------------|
| n (patients): RNFL                       | 10               | 5                                                  |                                 |
| n (patients): MacV                       | 10               | 4                                                  |                                 |
| n (eyes): RNFL                           | 20               | 10                                                 |                                 |
| n (eyes): MacV                           | 20               | 8                                                  |                                 |
| age yr (S.D.)                            | 63.4 (6.7)       | 63.4 (6.1)                                         |                                 |
| male sex no. (%)                         | 3 (30)           | 1 (20)                                             |                                 |
| CDR (S.D.)                               | 0                | 1.2 (0.8)                                          |                                 |
| mean RNFL thickness $\mu\text{m}$ (S.D.) | 95.0 (7.3)       | 90.3 (5.3)                                         | p = 0.149                       |
| mean MacV $\text{mm}^3$ (S.D.)           | 3.05 (0.12)      | 2.91 (0.12)                                        | p = 0.024                       |
| mean GCC volume $\text{mm}^3$ (S.D.)     | 0.77 (0.09)      | 0.72 (0.09)                                        | p = 0.219                       |
| mean INL volume $\text{mm}^3$ (S.D.)     | 0.33 (0.03)      | 0.30 (0.01)                                        | p = 0.011                       |
| mean ONL volume $\text{mm}^3$ (S.D.)     | 0.66 (0.08)      | 0.61 (0.07)                                        | p = 0.254                       |

**Figure S1. Clinical characteristics of human subjects who underwent retinal imaging.** Quantification of OCT images was performed by automated software algorithms (Heidelberg Engineering, Heidelberg, Germany). P-values were determined via mixed effects linear regression analysis.
